# Supplementary material for: Evaluation of Ruxolitinib for Steroid-Refractory Chronic Graft-vs-Host Disease After Allogeneic Hematopoietic Stem Cell Transplantation
Source: PubMed Central journal article supplement (PMC7841467; doi:10.1001/jamanetworkopen.2020.34750), 2021-01-27
Supplement: jamanetwopen-e2034750-s001.pdf [file jamanetwopen-e2034750-s001.pdf]

## Supplemental Online Content

Wu H, Shi J, Luo Y, et al. Evaluation of ruxolitinib for steroid-refractory chronic graft-vs-host disease after allogeneic hematopoietic stem cell transplantation. *JAMA Netw Open*. 2021;4(1):e2034750. doi:10.1001/jamanetworkopen.2020.34750

**eTable.** Safety Profile of Ruxolitinib

This supplemental material has been provided by the authors to give readers additional information about their work.

eTable. Safety Profile of Ruxolitinib

| Adverse effects          | Cases (%)   |
|--------------------------|-------------|
| Infection                |             |
| Lung infection           | 11/41(26.8) |
| CMV reactivation         | 5/34(14.7)  |
| EBV reactivation         | 19/36(52.7) |
| Sepsis                   | 2/41(4.9)   |
| HBV reaction             | 1/41(2.4)   |
| Cytopenia                | 6/41(14.6)  |
| Grade 1-2                | 3(7.3)      |
| Grade 3-4                | 3 (7.3)     |
| Malignancy relapse       | 6/41(14.6)  |
| Necrosis of femoral head | 8/41(19.5)  |

Abbreviations: CMV, Cytomegalovirus; EBV, Epstein-Barr virus; HBV, hepatitis B virus.
